# Supplementary material for: Planetary boundary layer evolution over the Amazon rain forest in episodes of deep moist convection at ATTO
Source: Copernicus journal article supplement (doi:10.5194/acp-2019-373), 2019-05-08
Supplement: Supplementary file [file acp-2019-373-RC2-supplement.pdf]

# Comments on “Planetary boundary layer evolution over the Amazon rain forest in episodes of deep moist convection at ATTO”, by Oliveira et al.

August 29, 2019

## General remarks

This manuscript analyzes turbulence data measured at several levels at an 80-m high tower at the ATTO site in the Amazon. The data are analyzed around the occurrence of deep moisture convection (DMC) and strong downdrafts of cold air from above associated with the passage of storms by the tower, as identified by meteorological radar.

The manuscript is well written and easy to understand. It is also basically an observational study. It consists of the description of the evolution in time of the response in atmospheric variables measured by the tower to the passage of the pool of cold air from the storm downdrafts.

As such, the manuscript does not contain new quantitative theories, nor does it describe any new phenomena, with the possible exception of the detailed attention to the temporal behavior of the sensible and latent heat fluxes, and the turbulence kinetic energy, measured at several levels at the tower during those episodes. It is however useful as a good example of the application of high-quality research data to the understanding of influence of storm downdrafts on the planetary boundary layer. As such, I think it deserves publication.

Because it is well written and documented, and of its descriptive nature, there are very few remarks that I can make on the manuscript. They are listed in the specific comments below.

## Recommendations

Publish.

## Specific comments

p. 2, l. 19–20 “This stage initiates in the wake of the storms and **it** may take 7-10 h for the ML to re-establish undisturbed conditions.”

p.2, l. 32–33 “They found latent and sensible heat flux enhancements reaching peak values of  $60 \text{ W m}^{-2}$  and  $250 \text{ W m}^{-2}$  for large, organized Mesoscale Convective Systems (MCSs).”

In general  $LE \gg H$  over the ocean, but here you are saying  $\Delta LE = 60 \text{ W m}^{-2}$ ,  $\Delta H = 250 \text{ W m}^{-2}$ . Please confirm that the enhancements are much larger for  $H$ .

p.4, l 10–11 “Computation of turbulent quantities from tower data such as mean flow, heat fluxes and turbulent kinetic energy were accomplished by employing Reynolds averaging at 1-min time intervals.”

Strictly speaking, “Reynolds averaging” is ensemble averaging, for which the so-called Reynolds postulates apply. Here, you should say “time averages over 1-min. intervals”.

p.4, l 31 gust (not gusts) fronts.
